# Supplementary material for: Sustainable robust waste-recycled ocean water-resistant fly ash-carbon nanotube nanocomposite-based triboelectric nanogenerator
Source: Royal Society of Chemistry journal article supplement (doi:10.1039/d2se01698b), 2023-01-01
Supplement: d2se01698b1.pdf [file d2se01698b1.pdf]

**Supplementary Information**

**Sustainable robust waste recycled ocean water resistant  
fly ash-carbon nanotubes nanocomposite based  
triboelectric nanogenerator**

Ashish Kumar Chaturvedi, Simadri Badatya, Asokan Pappu, Avanish Kumar Srivastava,  
Manoj KumarGupta\*

Green Engineered Materials and Additive Manufacturing Division, CSIR-Advanced  
Materials and Processes Research Institute, Bhopal, Madhya Pradesh 462042, India

<sup>b</sup>Academy of Scientific and Innovative Research (AcSIR), Ghaziabad, Uttar Pradesh-  
201002, India

\*E-mail: [mkgupta@ampri.res.in](mailto:mkgupta@ampri.res.in) , [manojampri@gmail.com](mailto:manojampri@gmail.com)

WD-XRF Result of Fly ash waste

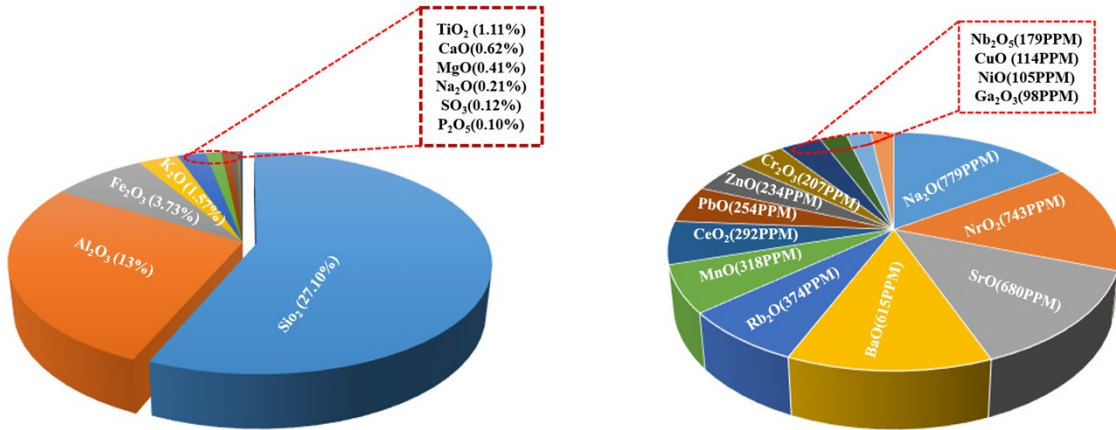

Figure S1: WD-XRF result of the fly ash waste

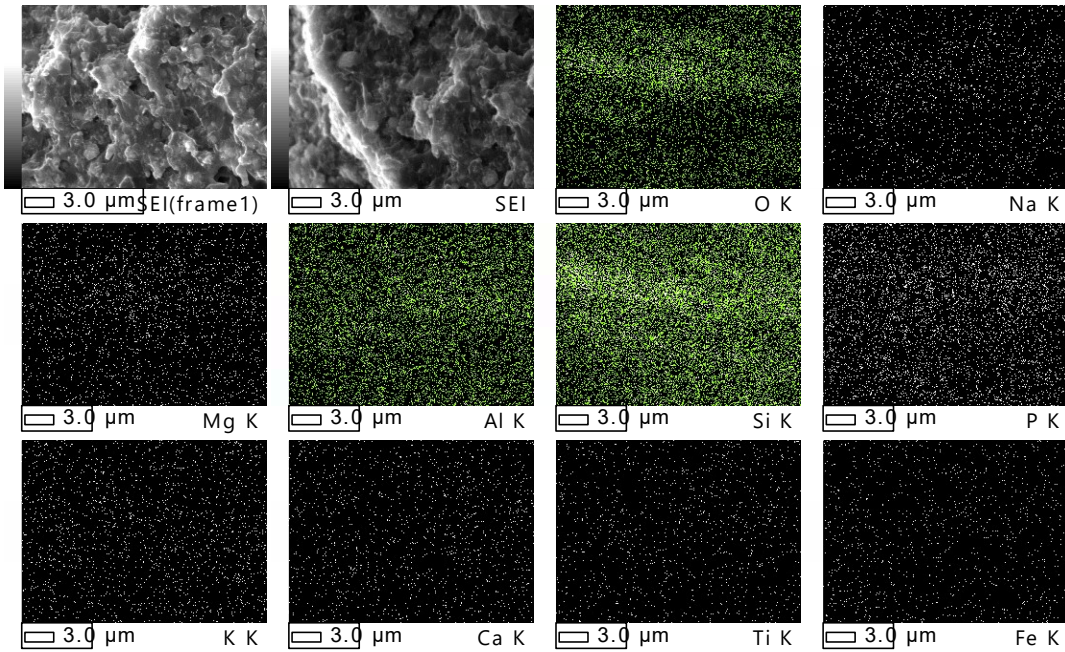

Figure S2: Elemental mapping of the CNT reinforced fly ash epoxy composites

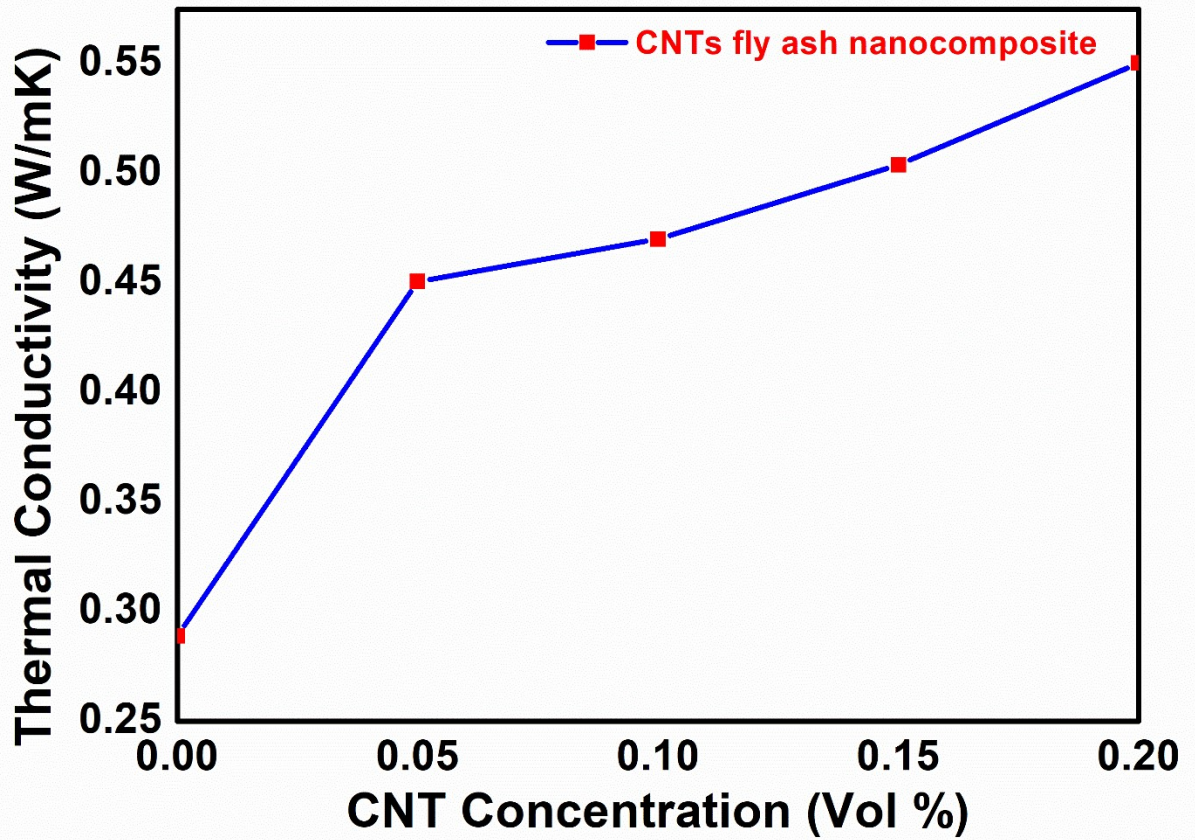

**Figure S3:** Thermal Conductivity of the CNT reinforced fly ash nanocomposites

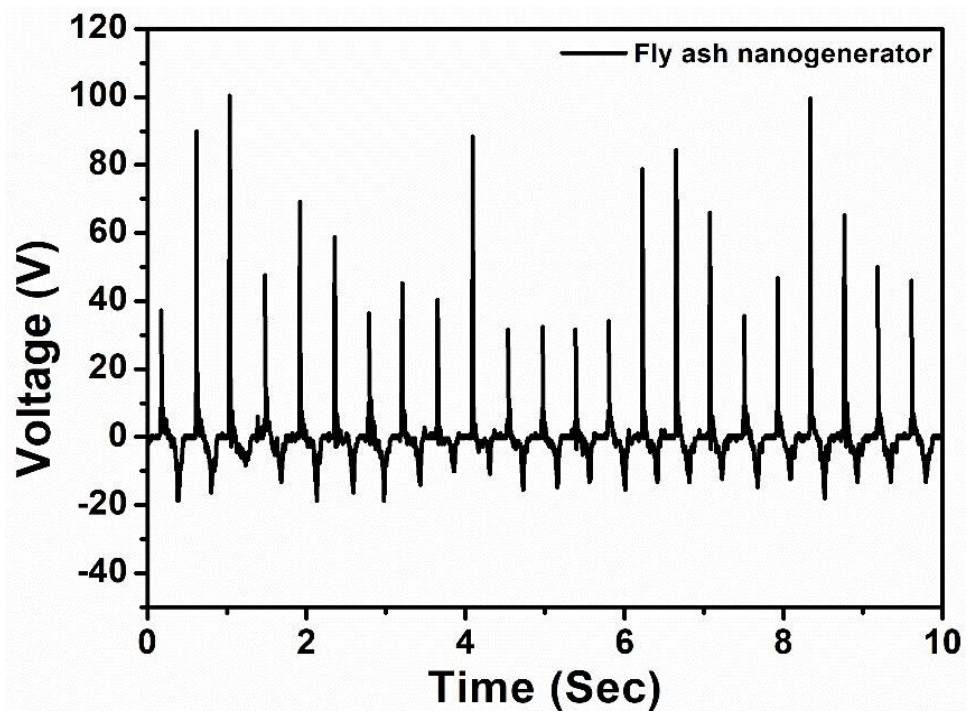

Figure S4. Output voltage from pristine fly ash based RTNG

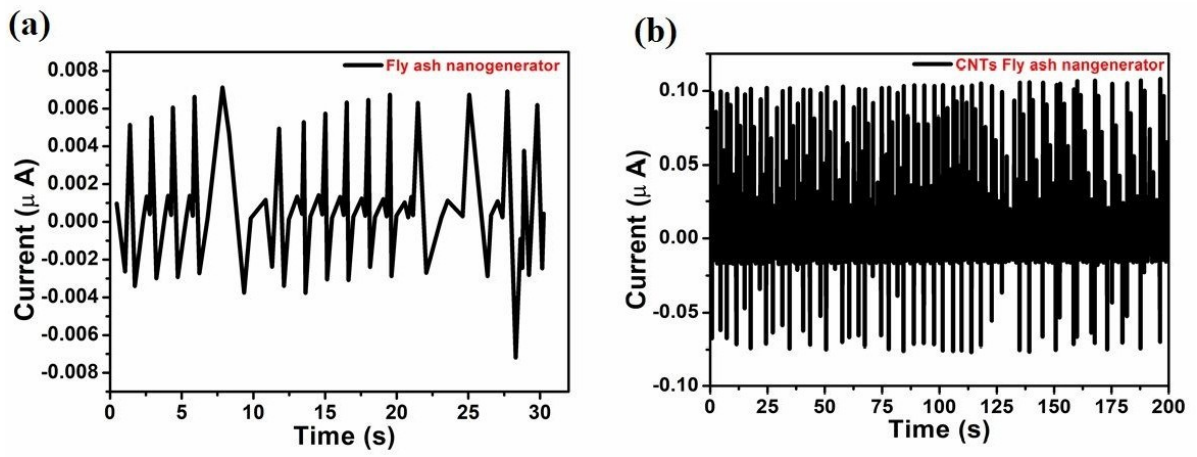

Figure S5. Output current from (a) pristine and (b) CNT reinforced fly ash based RTNG device.

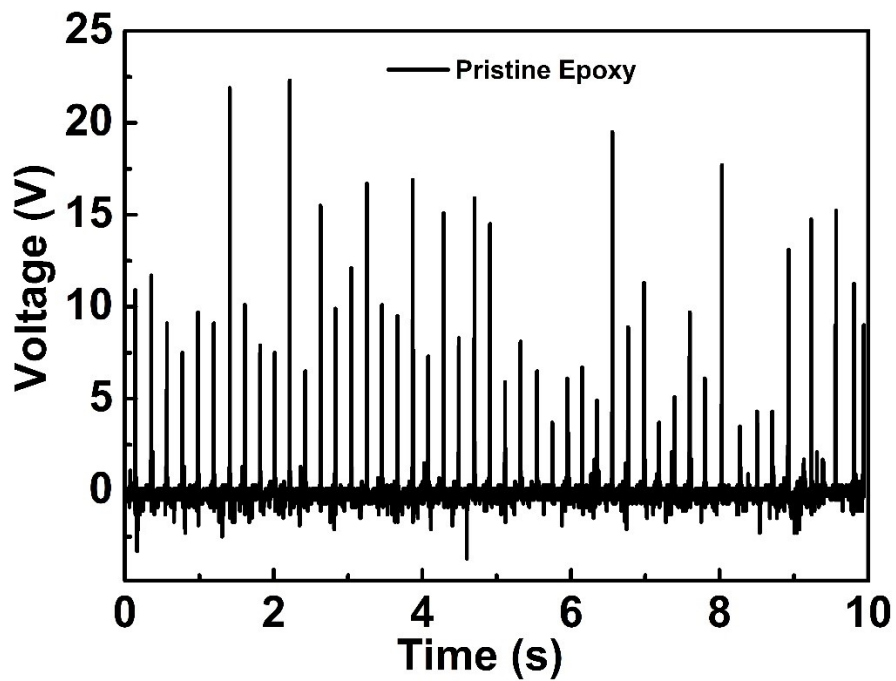

Figure S6. Output voltage from pristine epoxy based TENG

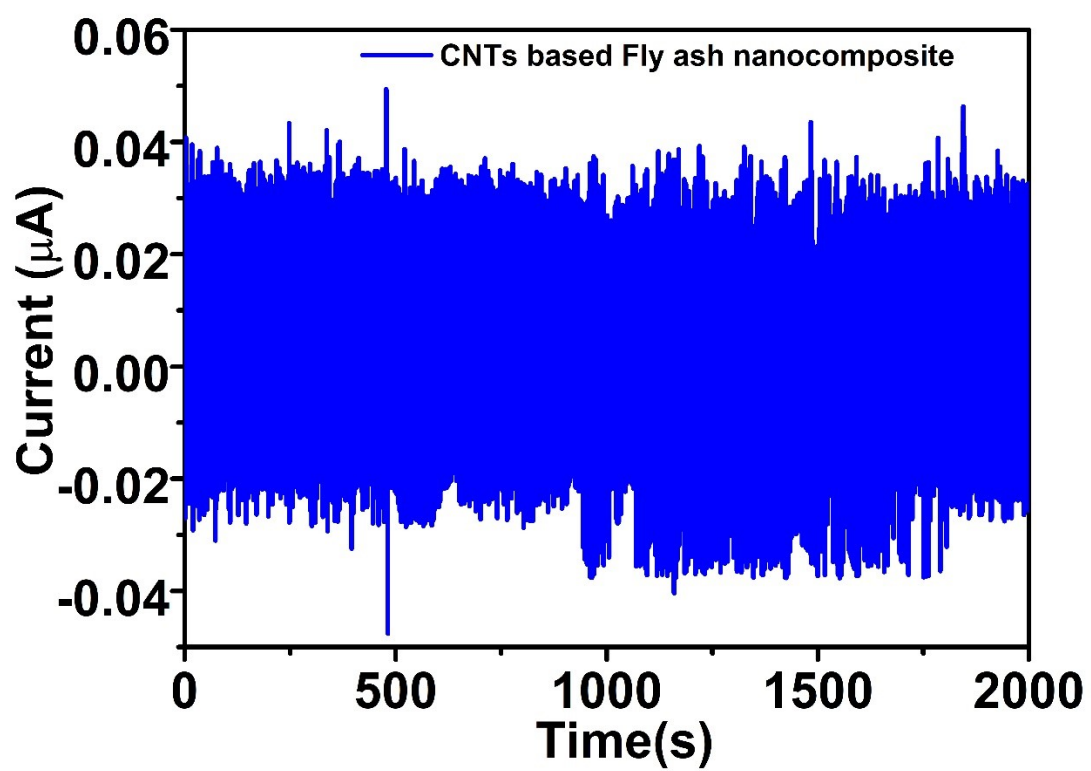

Figure S7. Durability test (Output current) from CNT reinforced fly ash based RTNG device.
